# Supplementary material for: Elevated IL-8 and abnormal Lymphocytes in pediatric primary Sjögren's syndrome: A single-center study
Source: Research Square preprint supplement (doi:10.21203/rs.3.rs-7238562/v1), 2025-08-20
Supplement: Supplementary file 1 [file 444d7055837fd87057de5e38.docx]

**Supplementary** **Figure 1.** Overview of the articles included and excluded.
